# Supplementary material
Source: Research Square preprint supplement (doi:10.21203/rs.3.rs-8896387/v1)
Supplement: Supplementary file 1 [file fefb3d9c9c663668cf984fc1.docx]

**Sup Table S1.** Results of anti-*Toxoplasma* IgG and IgM in French blood donors, using Platelia® Toxo IgG and IgM associated with VIDAS® Toxo IgG and/or IgM.

|  | **Positive Platelia® IgG** **(n= 1,010)** | **Doubtful Platelia® IgG (n=8)** | | | **Negative Platelia® IgG** **(n= 977)** |
| --- | --- | --- | --- | --- | --- |
|  | Positive VIDAS®  IgG (n=2) | Doubtful VIDAS®  IgG (n= 3) | Negative VIDAS®  IgG (n= 3) |
| **Positive Platelia® IgM** **(n= 133)** | **129** | **-** | **-** | **1** | **3** |
| Positive VIDAS® IgM (n= 24) | 24 a | - | - | - | - |
| Doubtful VIDAS® IgM (n= 7) | 7 a | - | - | - | - |
| Negative VIDAS® IgM (n = 102) | 98 | - | - | 1 | 3 |
| **Doubtful Platelia® IgM** **(n= 40)** | **39** | **-** | **-** | **-** | **1** |
| Positive VIDAS® IgM (n= 0) | - | - | - | - | - |
| Doubtful VIDAS® IgM (n= 1) | 1 a | - | - | - | - |
| Negative VIDAS® IgM (n= 39) | 38 | - | - | - | 1 |
| **Negative Platelia® IgM** **(n= 1,822)** | **842** | **2** | **3** b | **2** | **973** |

aAn IgG avidity test (VIDAS® Toxo IgG Avidity) was performed on those sera

b all 3 were confirmed positive by western-blot
